# Supplementary material for: Peripheral halo-functionalization in [Cu(N^N)(P^P)]+emitters: influence on the performances of light-emitting electrochemical cells
Source: Royal Society of Chemistry journal article supplement (doi:10.1039/c6dt02665f), 2016-01-01
Supplement: c6dt02665f1.pdf [file c6dt02665f1.pdf]

ESI to accompany:

## ***Peripheral halo-functionalization in [Cu(N<sup>^</sup>N)(P<sup>^</sup>P)]<sup>+</sup> emitters: their influence on the performances of light-emitting electrochemical cells***

Fabian Brunner,<sup>a</sup> Laura Martínez-Sarti,<sup>b</sup> Sarah Keller,<sup>a</sup> Antonio Pertegás,<sup>b</sup> Alessandro Prescimone,<sup>a</sup> Edwin C. Constable,<sup>a</sup> Henk J. Bolink<sup>\*b,c</sup> and Catherine E. Housecroft<sup>\*a</sup>

Fig. S1. Structure of the [Cu(**3**)(xantphos)]<sup>+</sup> cation.

Fig. S2. Structure of the [Cu(**1**)(POP)]<sup>+</sup> cation.

Fig. S3. Structure of the [Cu(**1**)<sub>2</sub>]<sup>+</sup> cation.

Fig. S4. Solution absorption spectra of [Cu(N<sup>^</sup>N)(POP)][PF<sub>6</sub>] (N<sup>^</sup>N = **1–5**).

Fig. S5. Normalized solid-state emission spectra of [Cu(N<sup>^</sup>N)(POP)][PF<sub>6</sub>] (N<sup>^</sup>N = **1–5**).

Fig. S6. Normalized solution (CH<sub>2</sub>Cl<sub>2</sub>, 2.5 x 10<sup>-5</sup> mol dm<sup>-3</sup>) emission spectra of [Cu(N<sup>^</sup>N)(xantphos)][PF<sub>6</sub>] (N<sup>^</sup>N = **1–5**).

Fig S7. Normalized thin film emission spectra of [Cu(N<sup>^</sup>N)(POP)][PF<sub>6</sub>] (N<sup>^</sup>N = **1–5**).

Fig S8. Normalized thin film emission spectra of [Cu(N<sup>^</sup>N)(xantphos)][PF<sub>6</sub>] (N<sup>^</sup>N = **1–5**).

Fig. S9. EL spectra for LECs.

Fig. S10. Luminance and average voltage versus time for the LEC containing [Cu(**3**)(POP)][PF<sub>6</sub>].

Fig S11. Luminance and average voltage versus time for the LEC with [Cu(**4**)(POP)][PF<sub>6</sub>].

Fig S12. Luminance and average voltage versus time for the LEC with [Cu(**4**)(xantphos)][PF<sub>6</sub>].

Fig. S13. Luminance, average voltage and efficiency in cd A<sup>-1</sup> versus time for the LEC with [Cu(**3**)(xantphos)][PF<sub>6</sub>].

Fig. S14. Average voltage for glass/ITO/PEDOT:PSS/active layer/Al devices.

Table S1. Photoluminescence lifetimes (τ<sub>1/2</sub>) for [Cu(N<sup>^</sup>N)(P<sup>^</sup>P)][PF<sub>6</sub>] complexes.

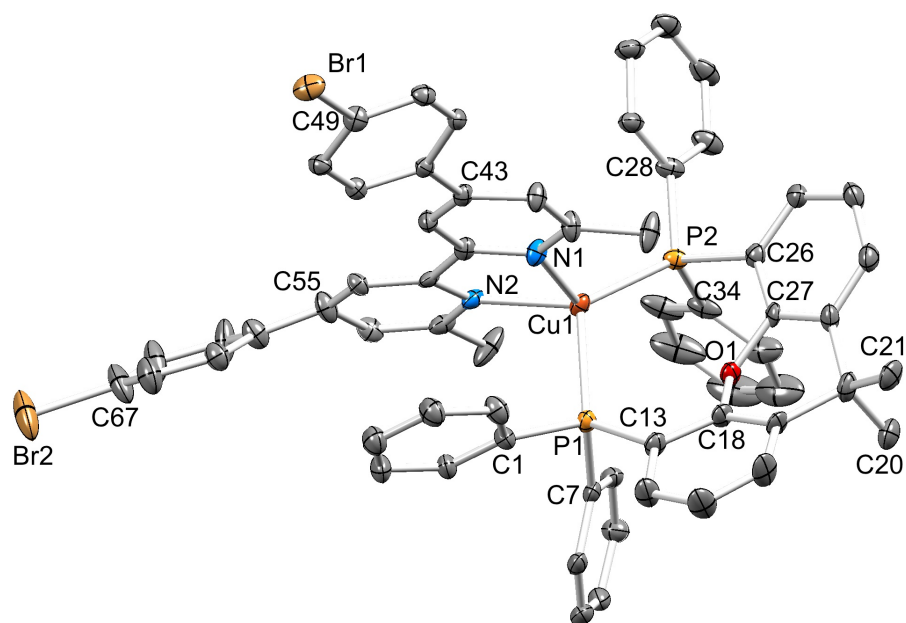

**Fig. S1.** Structure of the  $[\text{Cu}(\mathbf{3})(\text{xantphos})]^+$  cation in  $[\text{Cu}(\mathbf{3})(\text{xantphos})][\text{PF}_6] \cdot 0.5\text{H}_2\text{O} \cdot \text{Et}_2\text{O}$  with ellipsoids plotted at the 30% probability level; H atoms are omitted for clarity. The bromophenyl group containing Br2 is disordered and has been modelled over two sites of equal occupancy which share atom C55 in common; only one site is shown. Selected bond parameters: Cu1–P1 = 2.317(3), Cu1–P2 = 2.258(3), Cu1–N1 = 2.080(8), Cu1–N2 = 2.121(8) Å; P1–Cu1–P2 = 117.08(11), P1–Cu1–N1 = 104.2(3), P2–Cu1–N1 = 119.6(3), P1–Cu1–N2 = 100.2(2), P2–Cu1–N2 = 129.3(2), N1–Cu1–N2 = 78.8(3)°.

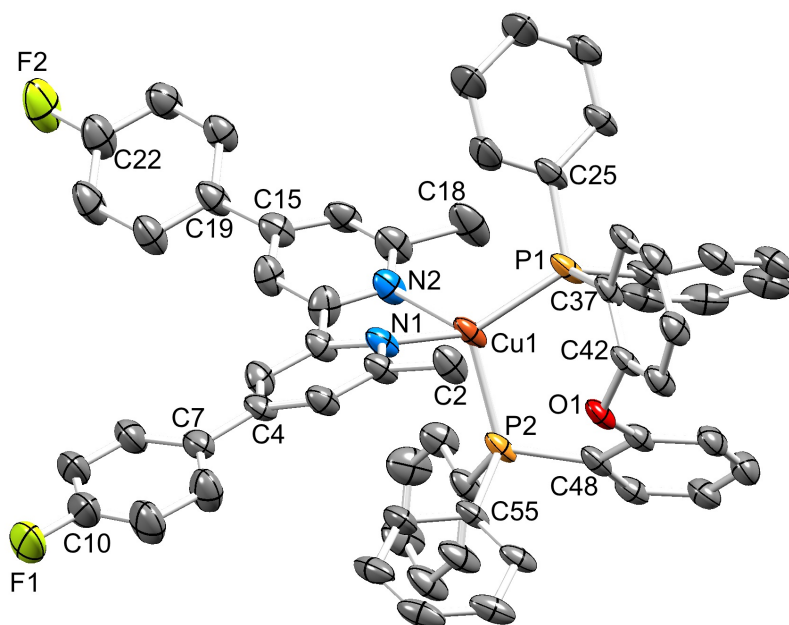

**Fig. S2.** Structure of the  $[\text{Cu}(\mathbf{1})(\text{POP})]^+$  cation in  $[\text{Cu}(\mathbf{1})(\text{POP})][\text{PF}_6] \cdot 0.8\text{H}_2\text{O}$  with ellipsoids plotted at the 30% probability level; H atoms are omitted for clarity. The pyridine ring containing N2 and the attached fluorophenyl group containing F2 are disordered and the unit has been modelled over two sites of 0.65:0.35 fractional occupancies; only the major occupancy site is shown. Selected bond parameters: Cu1–N1 = 2.099(6), Cu1–N2 = 2.097(5), Cu1–P1 = 2.2523(15), Cu1–P2 = 2.297(2) Å; N1–Cu1–N2 = 78.5(2), N1–Cu1–P1 = 123.71(15), N2–Cu1–P1 = 120.00(16), N1–Cu1–P2 = 104.32(15), N2–Cu1–P2 = 116.27(17), P1–Cu1–P2 = 110.37(8)°.

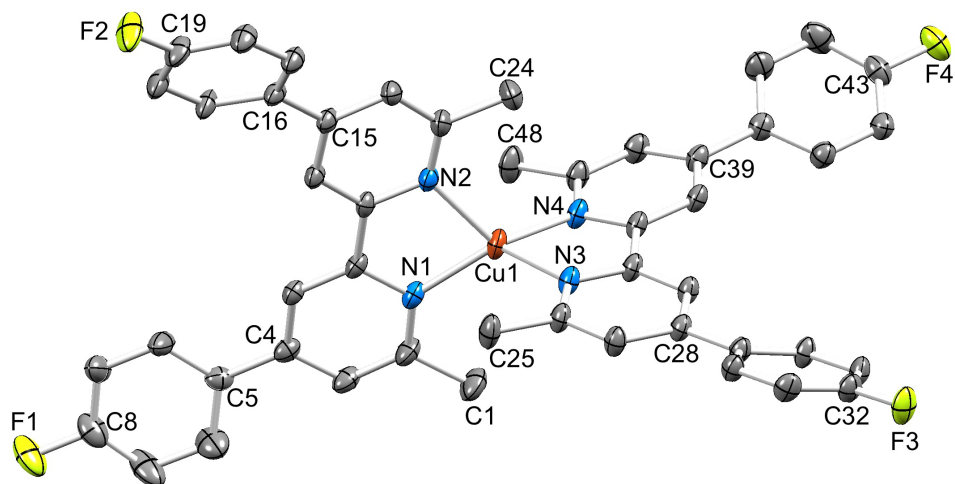

**Fig. S3.** Structure of the  $[\text{Cu}(\mathbf{1})_2]^+$  cation in  $[\text{Cu}(\mathbf{1})_2][\text{PF}_6]$  with ellipsoids plotted at the 30% probability level; H atoms are omitted for clarity. Selected bond parameters: Cu1–N2 = 2.044(2), Cu1–N1 = 2.001(2), Cu1–N3 = 2.027(2), Cu1–N4 = 2.000(2) Å; N2–Cu1–N1 = 82.13(9), N2–Cu1–N3 = 117.02(9), N1–Cu1–N3 = 123.42(10), N2–Cu1–N4 = 123.20(10), N1–Cu1–N4 = 133.76(10), N3–Cu1–N4 = 81.89(9)°.

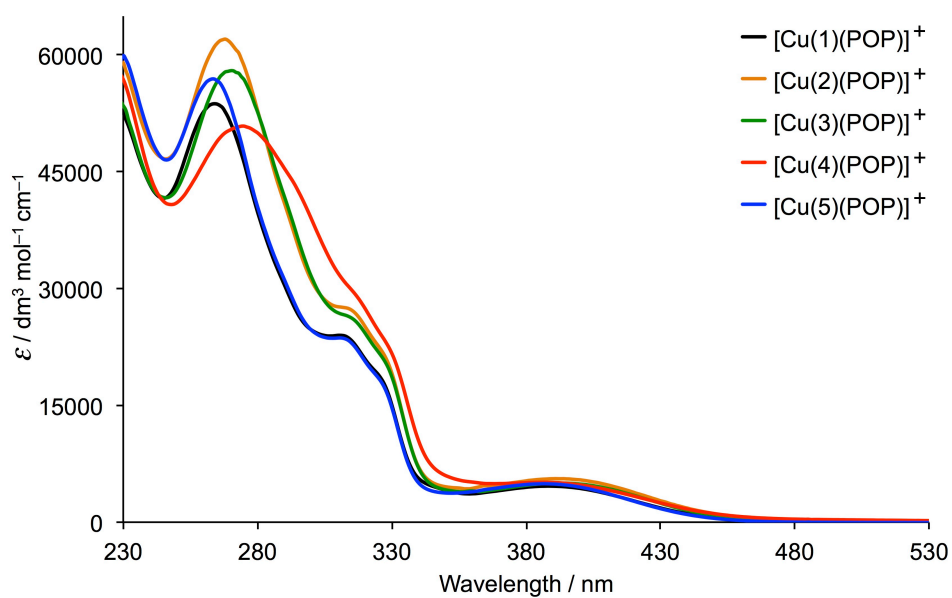

**Fig. S4.** Solution ( $\text{CH}_2\text{Cl}_2$ ,  $2.5 \times 10^{-5} \text{ mol dm}^{-3}$ ) absorption spectra of  $[\text{Cu}(\text{N}^{\text{N}})(\text{POP})]^+[\text{PF}_6]^-$  ( $\text{N}^{\text{N}} = \mathbf{1-5}$ ) complexes.

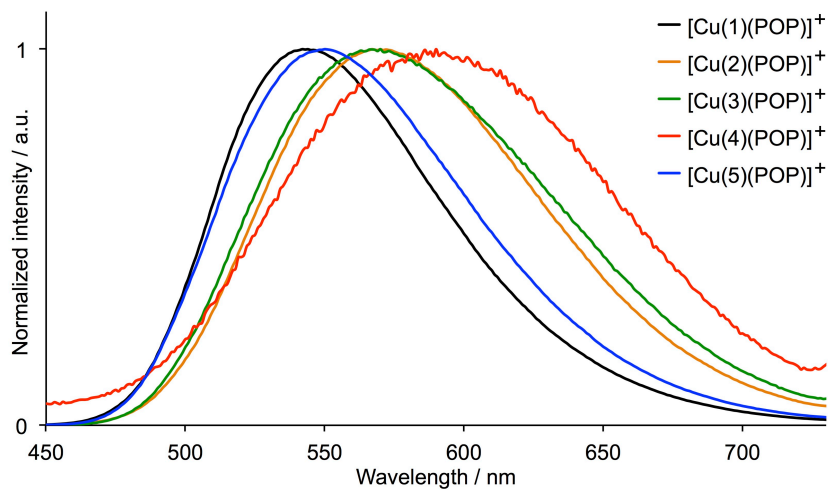

Fig. S5. Normalized solid-state emission spectra of  $[\text{Cu}(\text{N}^{\text{N}})(\text{POP})][\text{PF}_6]$  ( $\text{N}^{\text{N}} = 1-5$ ). ( $\lambda_{\text{exc}} = 365$  nm).

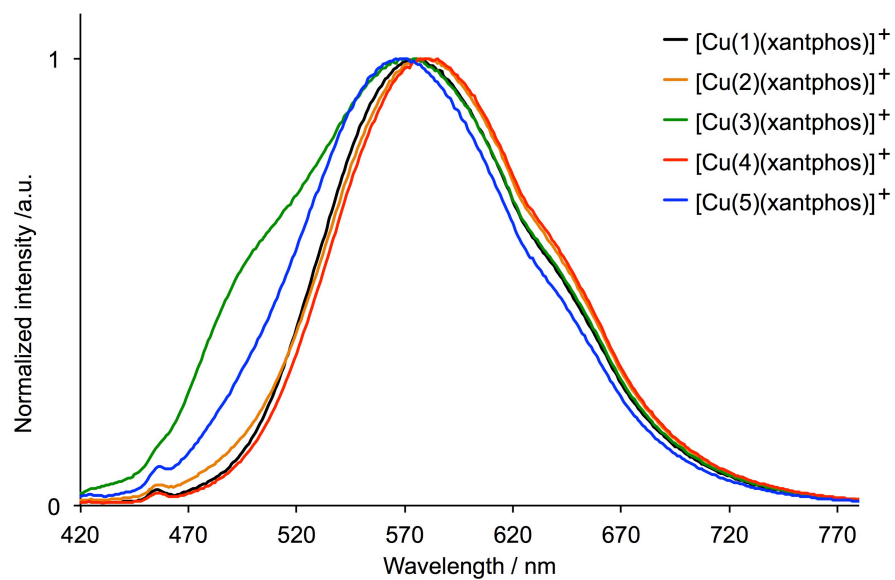

Fig. S6. Normalized solution ( $\text{CH}_2\text{Cl}_2$ ,  $2.5 \times 10^{-5}$  mol  $\text{dm}^{-3}$ ) emission spectra of  $[\text{Cu}(\text{N}^{\text{N}})(\text{xantphos})][\text{PF}_6]$  ( $\text{N}^{\text{N}} = 1-5$ ). ( $\lambda_{\text{exc}} = 400$  nm).

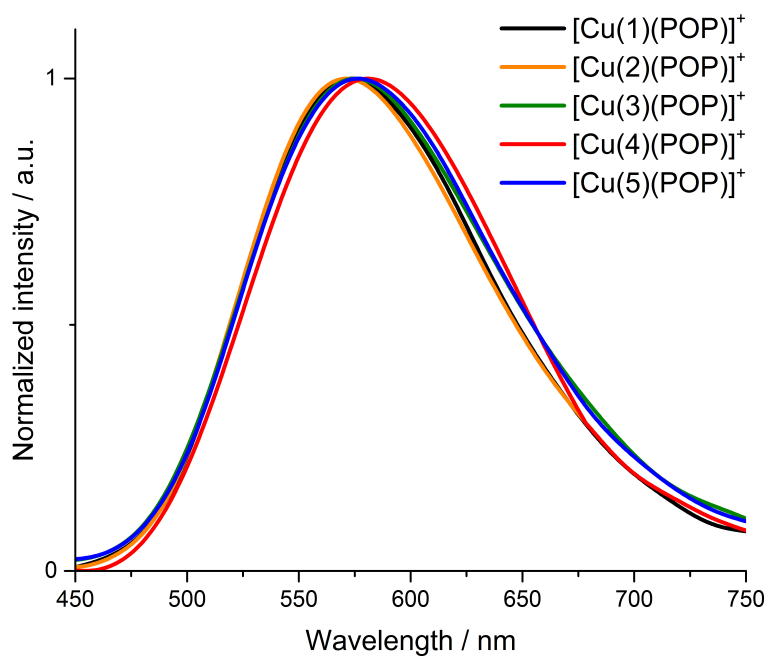

**Fig. S7.** Normalized thin film emission spectra of  $[\text{Cu}(\text{N}^{\wedge}\text{N})(\text{POP})][\text{PF}_6]$  ( $\text{N}^{\wedge}\text{N} = 1-5$ ). ( $\lambda_{\text{exc}} = 365$  nm). The thin film consisted of the complex mixed with the ionic liquid 1-ethyl-3-methylimidazolium hexafluoridophosphate.

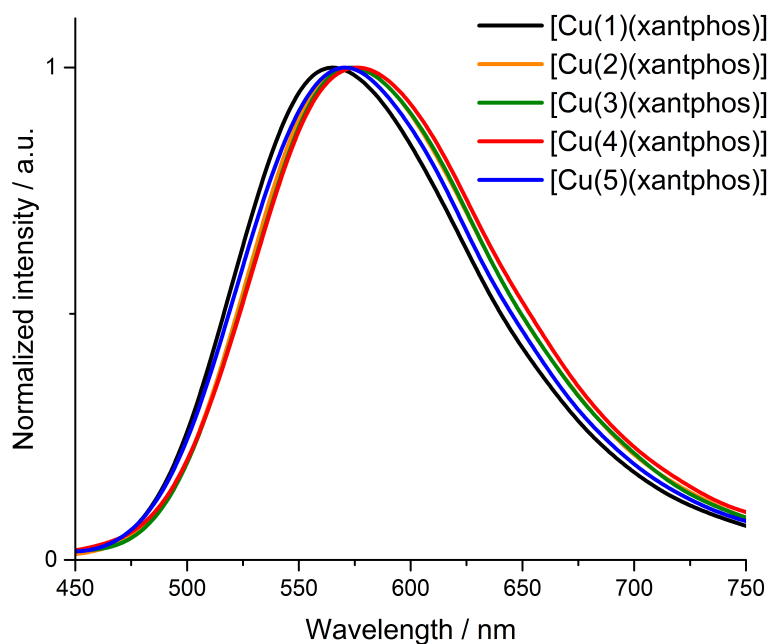

**Fig. S8.** Normalized thin film emission spectra of  $[\text{Cu}(\text{N}^{\wedge}\text{N})(\text{xantphos})][\text{PF}_6]$  ( $\text{N}^{\wedge}\text{N} = 1-5$ ). ( $\lambda_{\text{exc}} = 365$  nm). The thin film consisted of the complex mixed with the ionic liquid 1-ethyl-3-methylimidazolium hexafluoridophosphate.

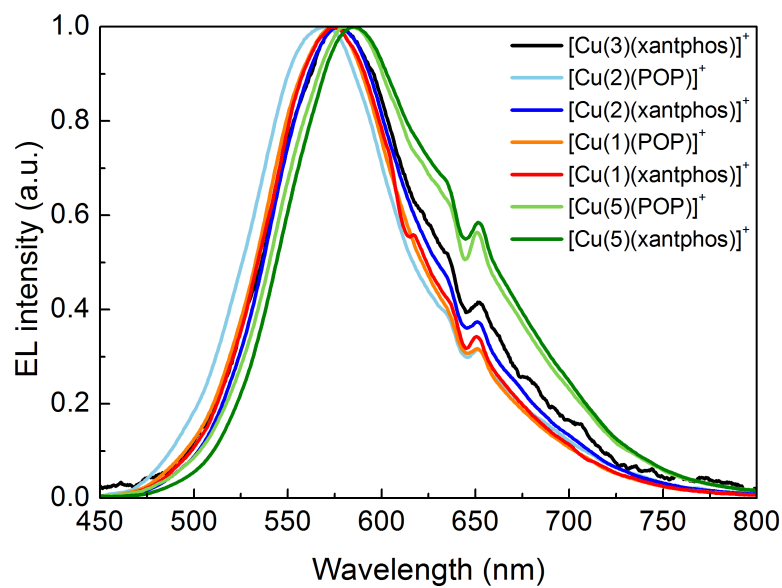

**Fig. S9.** EL spectra for LECs containing  $[\text{Cu}(3)(\text{xantphos})]^+$ ,  $[\text{Cu}(2)(\text{POP})]^+$ ,  $[\text{Cu}(2)(\text{xantphos})]^+$ ,  $[\text{Cu}(1)(\text{POP})]^+$ ,  $[\text{Cu}(1)(\text{xantphos})]^+$ ,  $[\text{Cu}(5)(\text{POP})]^+$  and  $[\text{Cu}(5)(\text{xantphos})]^+$ .

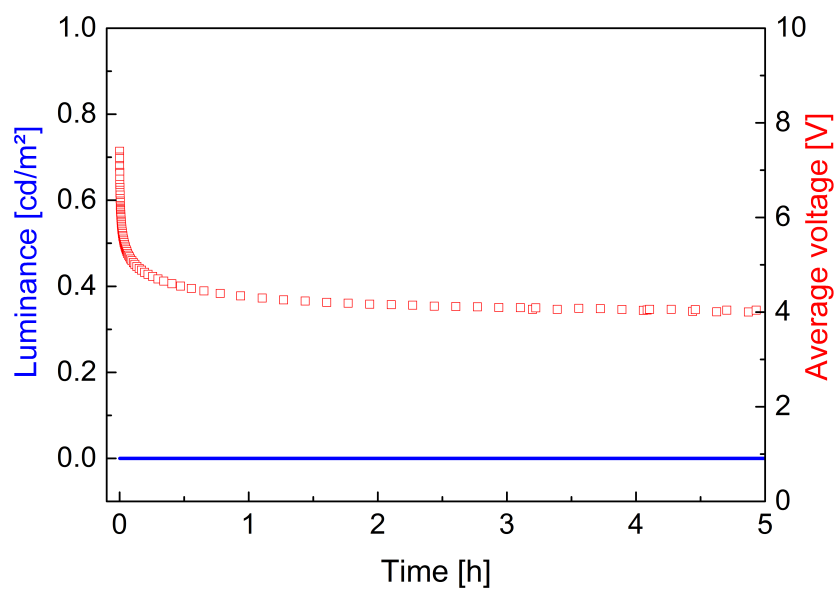

**Fig. S10.** Luminance (blue line) and average voltage (red symbols) versus time for the LEC with  $[\text{Cu}(3)(\text{POP})][\text{PF}_6]$  by applying a block-wave pulsed current of  $50 \text{ A m}^{-2}$  at a frequency of 1 kHz and a duty cycle of 50%.

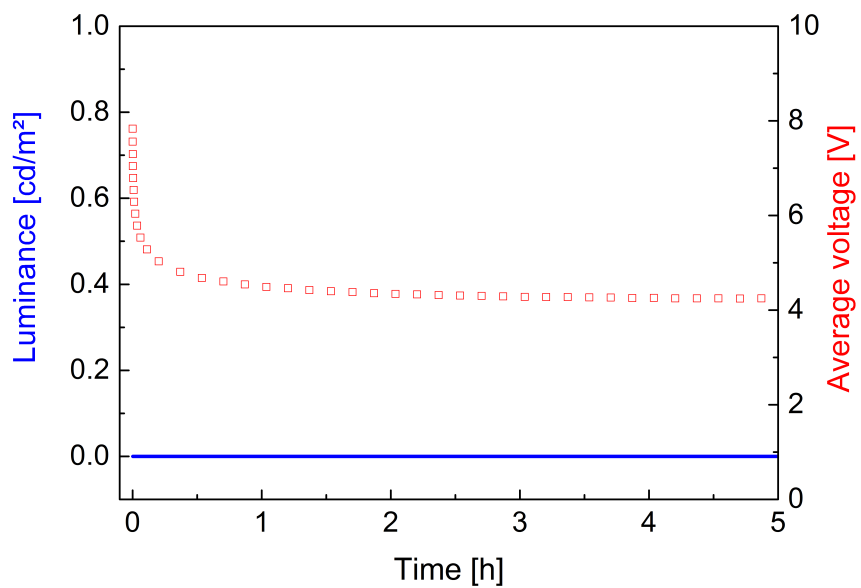

**Fig. S11.** Luminance (blue line) and average voltage (red symbols) versus time for the LEC with [Cu(4)(POP)][PF<sub>6</sub>] by applying a block-wave pulsed current of 50 A m<sup>-2</sup> at a frequency of 1 kHz and a duty cycle of 50%.

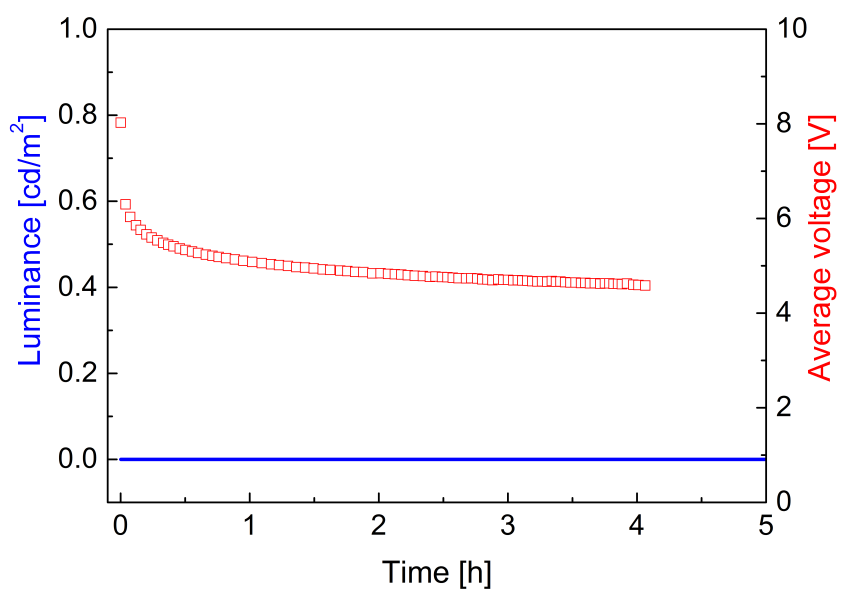

**Fig. S12.** Luminance (blue line) and average voltage (red symbols) versus time for the LEC with [Cu(4)(xantphos)][PF<sub>6</sub>] by applying a block-wave pulsed current of 50 A m<sup>-2</sup> at a frequency of 1 kHz and a duty cycle of 50%.

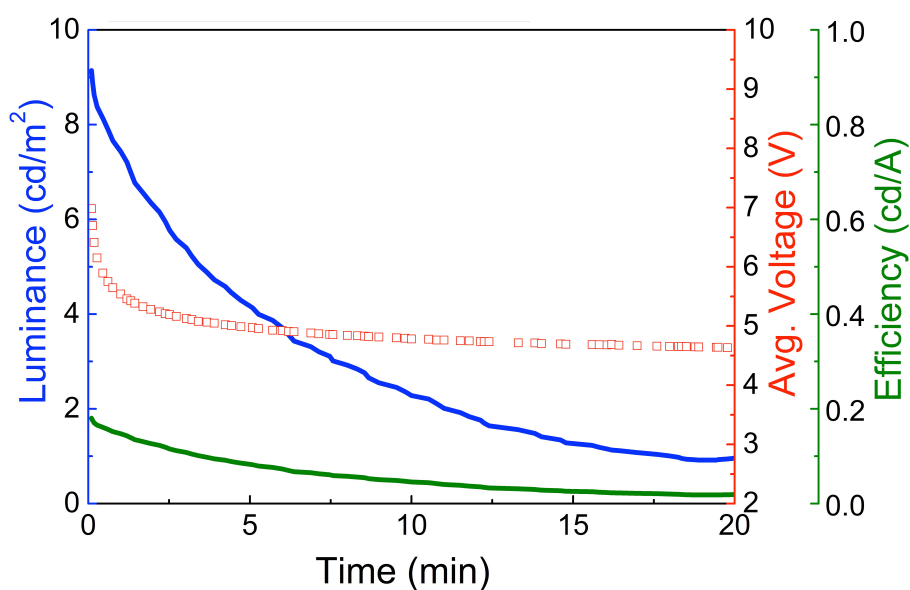

**Fig. S13.** Luminance (blue line), average voltage (red symbols) and efficiency in  $\text{cd A}^{-1}$  (green line) versus time for the LEC with  $[\text{Cu}(\mathbf{3})(\text{xantphos})][\text{PF}_6]$  by applying a block-wave pulsed current of  $50 \text{ A m}^{-2}$  at a frequency of 1 kHz and a duty cycle of 50%.

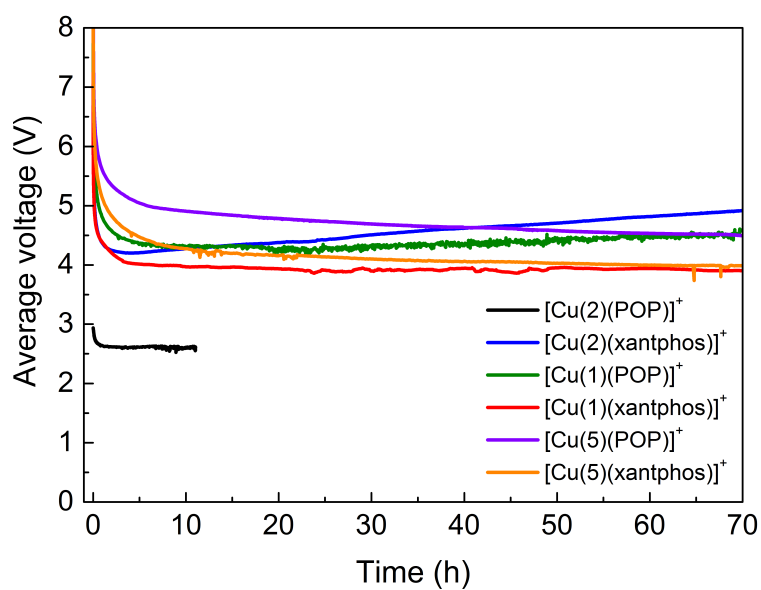

**Fig. S14.** Average voltage for glass/ITO/PEDOT:PSS/active layer/Al devices measured by applying a block-wave pulsed current of  $50 \text{ A m}^{-2}$  at a frequency of 1 kHz and a duty cycle of 50%. The active layer consisted of the different  $[\text{Cu}(\text{N}^{\wedge}\text{N})(\text{P}^{\wedge}\text{P})][\text{PF}_6]$  ( $\text{N}^{\wedge}\text{N} = 1, 2$  and 5) complexes mixed with the ionic liquid 1-ethyl-3-methylimidazolium hexafluoridophosphate.



Table S1. Photoluminescence lifetimes ( $\tau_{1/2}$ ) for [Cu(N<sup>N</sup>)(P<sup>^P</sup>)]PF<sub>6</sub> complexes.

| Complex cation                 | CH <sub>2</sub> Cl <sub>2</sub> degassed solution <sup>a,b</sup> |        |                              |       |                               | Powder <sup>c</sup>          |        |                              |         |                               |
|--------------------------------|------------------------------------------------------------------|--------|------------------------------|-------|-------------------------------|------------------------------|--------|------------------------------|---------|-------------------------------|
|                                | $\tau_{1/2}(1)$<br>/ $\mu$ s                                     | A1     | $\tau_{1/2}(2)$<br>/ $\mu$ s | A2    | $\tau_{1/2}(av)$<br>/ $\mu$ s | $\tau_{1/2}(1)$<br>/ $\mu$ s | A1     | $\tau_{1/2}(2)$<br>/ $\mu$ s | A2      | $\tau_{1/2}(av)$<br>/ $\mu$ s |
| [Cu(1)(POP)] <sup>+</sup>      | 4.5                                                              |        |                              |       | 4.5                           | 11.7                         | 0.9118 | 1.5                          | 0.05582 | 11.1                          |
| [Cu(2)(POP)] <sup>+</sup>      | 4.2                                                              |        |                              |       | 4.2                           | 5.6                          | 0.5335 | 1.5                          | 0.3531  | 4.0                           |
| [Cu(3)(POP)] <sup>+</sup>      | 4.4                                                              |        |                              |       | 4.4                           | 7.1                          | 0.3976 | 1.6                          | 0.4517  | 4.2                           |
| [Cu(4)(POP)] <sup>+</sup>      | 4.1                                                              |        |                              |       | 4.1                           | 2.3                          | 0.2638 | 0.6                          | 0.4417  | 1.2                           |
| [Cu(5)(POP)] <sup>+</sup>      | 4.5                                                              | 0.4225 | 1.8                          | 0.504 | 3.0                           | 11.5                         | 0.8209 | 1.8                          | 0.1259  | 10.2                          |
| [Cu(1)(xantphos)] <sup>+</sup> | 2.5                                                              |        |                              |       | 2.5                           | 7.2                          | 0.6052 | 0.8                          | 0.1709  | 5.8                           |
| [Cu(2)(xantphos)] <sup>+</sup> | 2.8                                                              |        |                              |       | 2.8                           | 7.0                          | 0.5854 | 1.9                          | 0.3025  | 5.2                           |
| [Cu(3)(xantphos)] <sup>+</sup> | 2.8                                                              |        |                              |       | 2.8                           | 8.3                          | 0.5975 | 1.9                          | 0.3223  | 6.1                           |
| [Cu(4)(xantphos)] <sup>+</sup> | 2.6                                                              |        |                              |       | 2.6                           | 4.7                          | 0.4578 | 1.2                          | 0.4559  | 3.0                           |
| [Cu(5)(xantphos)] <sup>+</sup> | 3.7                                                              |        |                              |       | 3.7                           | 7.2                          | 0.6728 | 1.6                          | 0.2477  | 5.7                           |
